# Supplementary material for: Characterization of a pathogenic nonmigratory fibroblast population in systemic sclerosis skin
Source: JCI journal article supplement (doi:10.1172/jci.insight.185618), 2025-04-15
Supplement: sd1 [file 1]

# Supplementary

# Supplementary Figure 1

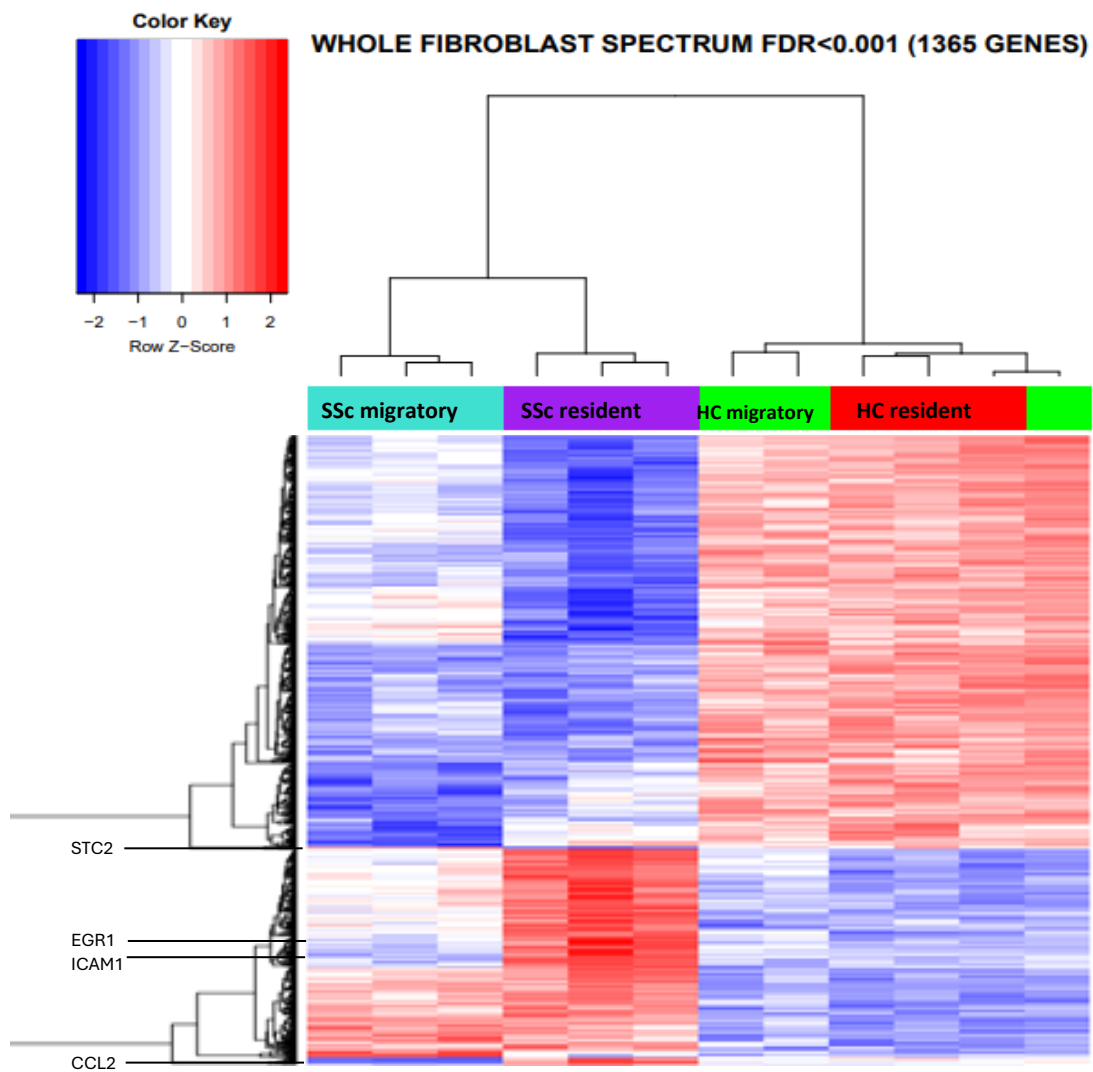

# Supplementary Figure 2

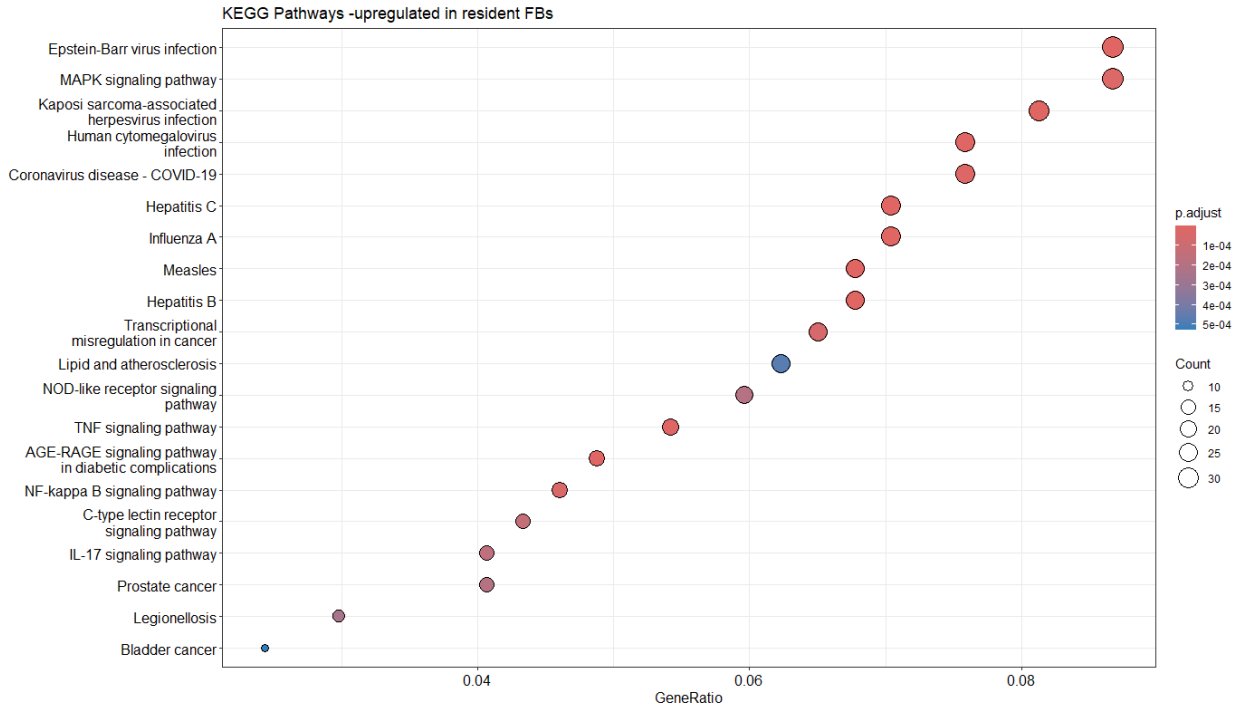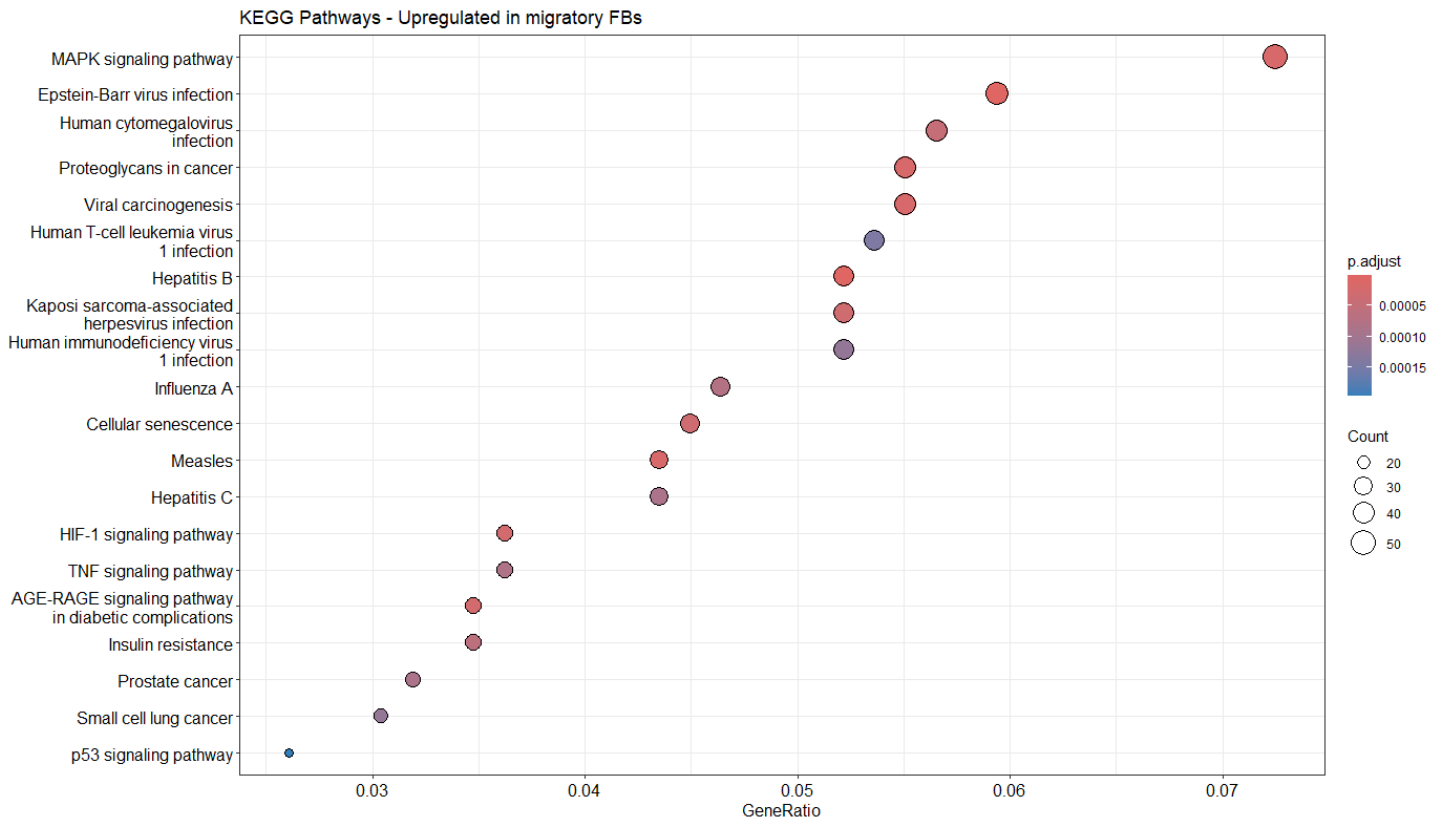

# Supplementary Figure 3

● Early dcSSc  
● Late dcSSc  
● Healthy Control

## A Violin plots of genes overexpressed in fibroblasts

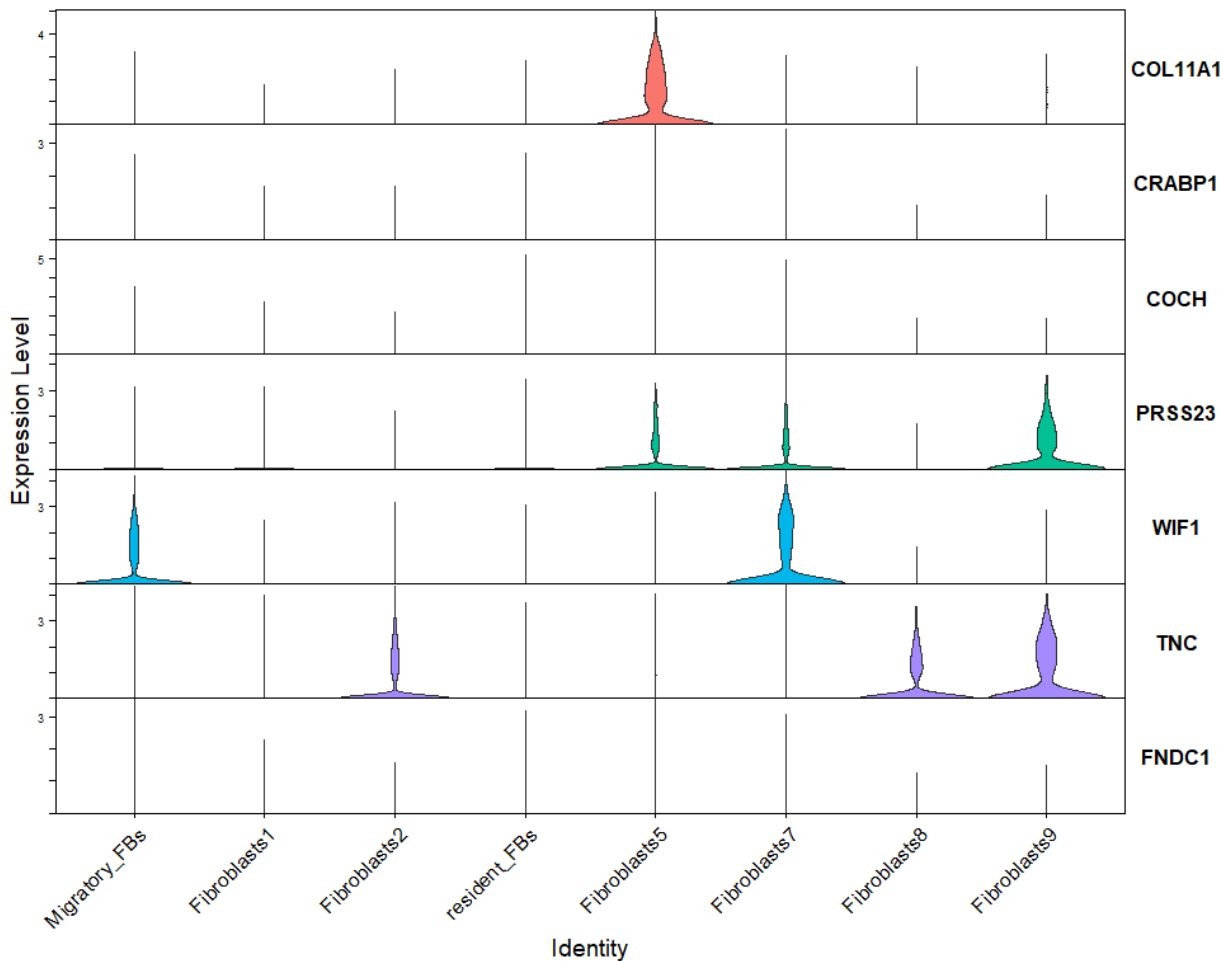

## B

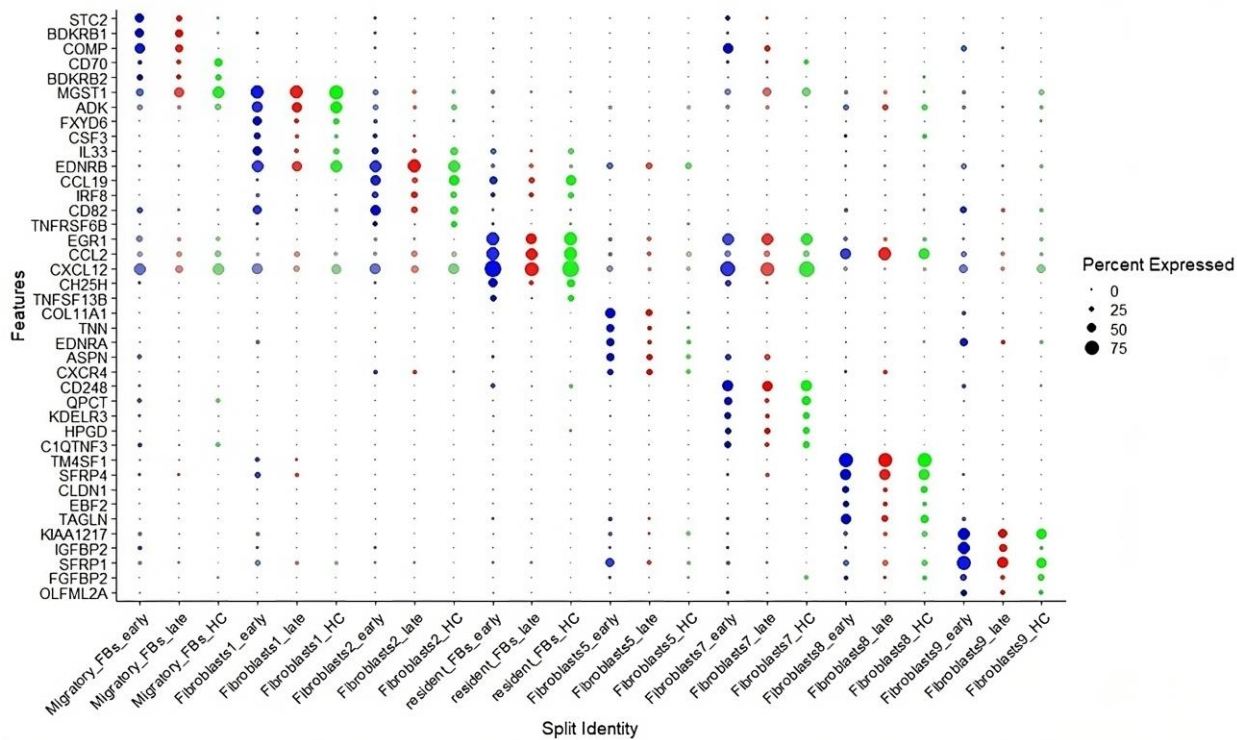

# Supplementary Figure 4

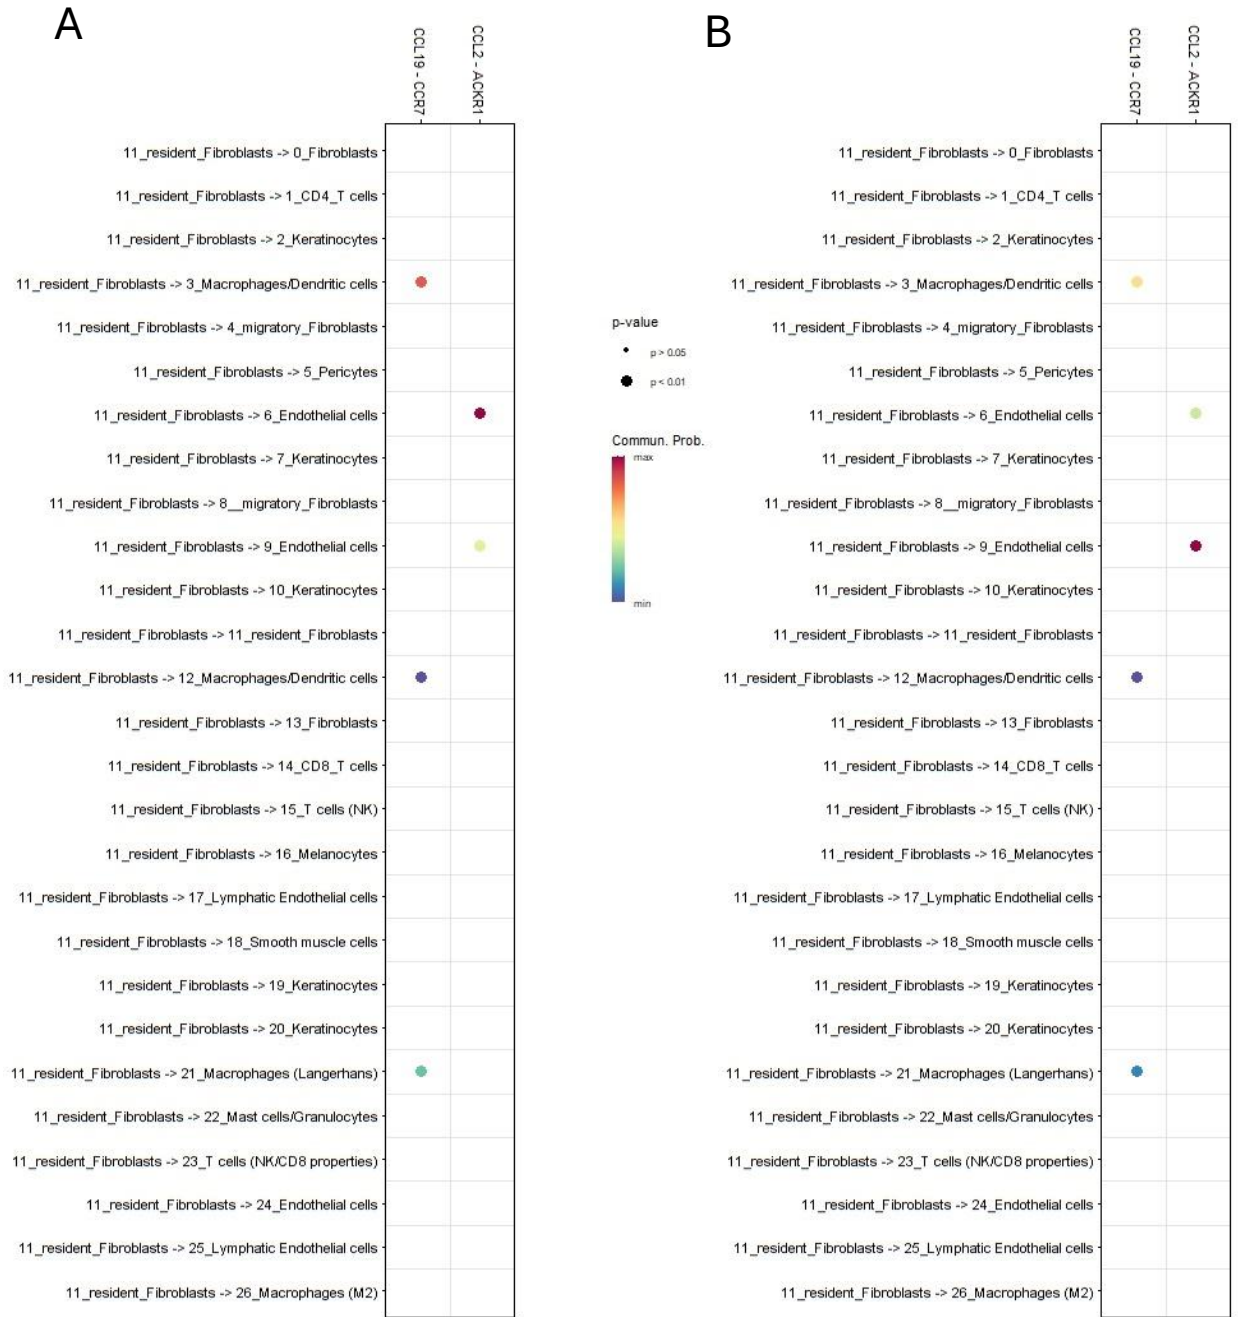

CCL L-R early-stage disease

CCL L-R late-stage disease

**Supplementary Table 1 Differential gene expression by bulk RNAseq for migratory and resident fibroblasts**

| Significantly upregulated Genes in SSc<br>migratory fibroblasts |                     |                     | Significantly upregulated Genes in<br>SSc resident fibroblasts |                     |                     |
|-----------------------------------------------------------------|---------------------|---------------------|----------------------------------------------------------------|---------------------|---------------------|
| Gene Name                                                       | Log <sub>2</sub> FC | adjusted p<br>value | Gene<br>Name                                                   | Log <sub>2</sub> FC | adjusted p<br>value |
| GPR1                                                            | 2.583               | 0.0004              | CCL2                                                           | 5.273               | <0.0001             |
| ANKRD33B                                                        | 2.368               | 0.0002              | CXCL8                                                          | 4.606               | 0.0002              |
| PPME1                                                           | 2.280               | 0.0014              | HBEGF                                                          | 4.218               | 0.0012              |
| KIF20A                                                          | 2.117               | 0.0046              | PTGS2                                                          | 4.107               | 0.0004              |
| CENPF                                                           | 2.109               | 0.0077              | ICAM1                                                          | 3.943               | <0.0001             |
| STC2                                                            | 2.062               | <0.0001             | MX1                                                            | 3.940               | 0.001               |
| GPER1                                                           | 2.034               | <0.0001             | EGR1                                                           | 3.925               | 0.0002              |
| MIR1915HG                                                       | 1.994               | 0.0078              | GPR68                                                          | 3.851               | <0.0001             |
| DYSF                                                            | 1.991               | 0.0004              | EGR2                                                           | 3.674               | 0.0002              |
| AC027237.3                                                      | 1.989               | 0.0012              | IFI44L                                                         | 3.524               | <0.0001             |
| ASPM                                                            | 1.958               | 0.0091              | CXCL6                                                          | 3.514               | 0.0008              |
| CTH                                                             | 1.952               | 0.0096              | HERC6                                                          | 3.500               | 0.002               |
| TMEM171                                                         | 1.856               | 0.001               | OAS2                                                           | 3.493               | 0.0078              |
| TRIB3                                                           | 1.847               | 0.0007              | IFI6                                                           | 3.421               | 0.0003              |
| VLDLR                                                           | 1.841               | 0.0017              | PDGFD                                                          | 3.342               | 0.0003              |
| PLEKHA2                                                         | 1.839               | 0.0007              | OAS1                                                           | 3.326               | 0.0006              |
| L3MBTL2-AS1                                                     | 1.809               | 0.0065              | CLDN11                                                         | 3.265               | 0.0139              |
| DLGAP5                                                          | 1.795               | 0.0143              | ALDH1A3                                                        | 3.250               | 0.0006              |
| DDIT4                                                           | 1.783               | 0.0007              | OAS3                                                           | 3.161               | 0.0009              |
| CLTCL1                                                          | 1.781               | 0.0003              | IFIT1                                                          | 3.100               | 0.0036              |

## Supplementary Table 2: Antibodies used in CellDIVE®

| REAGENT or RESOURCE                                                            | SOURCE      | IDENTIFIER                       |
|--------------------------------------------------------------------------------|-------------|----------------------------------|
| Antibodies                                                                     |             |                                  |
| MMP-2 polyclonal, Rabbit IgG                                                   | Merck       | Cat#HPA001938                    |
| CD34, clone QBEND-10, Mouse IgG1k, Alexa Flour 555                             | Biolengend  | cat# 826401                      |
| Unconjugated - Goat Polyclonal Anti-Human Ccl19 / mip-3 beta antibody          | R&D systems | Cat# AF361;<br>RRID:AB_355323    |
| Alexa Fluor® 488 - Recombinant Rabbit monoclonal [EPR3208] Anti-CD146 antibody | Abcam       | Cat#ab196448,<br>RRID:AB_2868591 |
| BSA and Azide free - Recombinant Rabbit monoclonal [EPR5480] Anti PDGFR alpha  | Abcam       | Cat# ab248689                    |
| Alexa Fluor® 647 - Mouse monoclonal (JC/70A+C31.3) anti CD31/PECAM-1 antibody  | Novus       | Cat# NBP2-34283                  |

**Supplementary Table 3: Top 10 upregulated genes in each fibroblast subset.**

| p_val     | avg_log2FC | pct.1 | pct.2 | p_val_adj | cluster       | gene       |
|-----------|------------|-------|-------|-----------|---------------|------------|
| 0         | 2.180609   | 0.672 | 0.197 | 0         | Migratory_FBs | CCN5       |
| 0         | 3.080696   | 0.368 | 0.068 | 0         | Migratory_FBs | STC2       |
| 0         | 2.984481   | 0.381 | 0.089 | 0         | Migratory_FBs | BDKRB1     |
| 0         | 2.542947   | 0.384 | 0.102 | 0         | Migratory_FBs | COMP       |
| 0         | 2.25016    | 0.336 | 0.058 | 0         | Migratory_FBs | WIF1       |
| 0         | 3.164405   | 0.3   | 0.031 | 0         | Migratory_FBs | CD70       |
| 0         | 2.454722   | 0.325 | 0.065 | 0         | Migratory_FBs | BDKRB2     |
| 0         | 2.423051   | 0.389 | 0.142 | 0         | Migratory_FBs | PTX3       |
| 0         | 2.416062   | 0.27  | 0.042 | 0         | Migratory_FBs | DPP4       |
| 0         | 2.291716   | 0.283 | 0.06  | 0         | Migratory_FBs | COL13A1    |
| 0         | 2.06616    | 0.732 | 0.356 | 0         | Fibroblasts1  | MGST1      |
| 0         | 1.782107   | 0.589 | 0.254 | 0         | Fibroblasts1  | ADK        |
| 0         | 2.660131   | 0.366 | 0.073 | 0         | Fibroblasts1  | FXD6       |
| 0         | 1.671575   | 0.451 | 0.187 | 0         | Fibroblasts1  | ARHGAP6    |
| 0         | 1.690304   | 0.371 | 0.133 | 0         | Fibroblasts1  | RBM19      |
| 0         | 2.090027   | 0.285 | 0.081 | 0         | Fibroblasts1  | CSF3       |
| 1.02E-233 | 1.670713   | 0.294 | 0.113 | 2.67E-229 | Fibroblasts1  | IFRD2      |
| 2.06E-227 | 1.84914    | 0.383 | 0.18  | 5.41E-223 | Fibroblasts1  | IL33       |
| 3.45E-194 | 1.678994   | 0.256 | 0.098 | 9.06E-190 | Fibroblasts1  | TLCD5      |
| 3.25E-79  | 1.773315   | 0.29  | 0.182 | 8.52E-75  | Fibroblasts1  | MMP1       |
| 0         | 1.691816   | 0.686 | 0.287 | 0         | Fibroblasts2  | EDNRB      |
| 0         | 2.349107   | 0.488 | 0.121 | 0         | Fibroblasts2  | CCL19      |
| 0         | 1.357373   | 0.755 | 0.487 | 0         | Fibroblasts2  | SNHG12     |
| 0         | 1.680376   | 0.38  | 0.121 | 0         | Fibroblasts2  | IRF8       |
| 0         | 1.339022   | 0.912 | 0.689 | 0         | Fibroblasts2  | VEGFA      |
| 2.49E-295 | 1.677243   | 0.476 | 0.207 | 6.53E-291 | Fibroblasts2  | CD82       |
| 1.17E-221 | 1.472556   | 0.464 | 0.227 | 3.07E-217 | Fibroblasts2  | TES        |
| 1.21E-164 | 1.829292   | 0.253 | 0.095 | 3.16E-160 | Fibroblasts2  | TNFRSF6B   |
| 1.84E-160 | 1.599409   | 0.311 | 0.14  | 4.83E-156 | Fibroblasts2  | SMAP2      |
| 4.17E-117 | 1.383055   | 0.327 | 0.172 | 1.09E-112 | Fibroblasts2  | ZDBF2      |
| 0         | 2.988599   | 0.678 | 0.255 | 0         | resident_FBs  | EGR1       |
| 0         | 2.805379   | 0.704 | 0.328 | 0         | resident_FBs  | CCL2       |
| 0         | 3.02811    | 0.888 | 0.537 | 0         | resident_FBs  | CXCL12     |
| 0         | 3.509834   | 0.419 | 0.092 | 0         | resident_FBs  | CH25H      |
| 0         | 2.415853   | 0.438 | 0.12  | 0         | resident_FBs  | CCL19      |
| 0         | 2.441189   | 0.457 | 0.144 | 0         | resident_FBs  | ADH1B      |
| 0         | 2.460388   | 0.694 | 0.441 | 0         | resident_FBs  | SOCS3      |
| 0         | 4.154897   | 0.28  | 0.041 | 0         | resident_FBs  | TNFSF13B   |
| 2.36E-266 | 2.491669   | 0.267 | 0.084 | 6.19E-262 | resident_FBs  | LDB2       |
| 3.40E-173 | 2.435649   | 0.285 | 0.125 | 8.92E-169 | resident_FBs  | AC008760.2 |
| 0         | 6.146014   | 0.44  | 0.023 | 0         | Fibroblasts5  | COL11A1    |
| 0         | 6.474796   | 0.356 | 0.006 | 0         | Fibroblasts5  | TNN        |
| 0         | 3.053653   | 0.357 | 0.076 | 0         | Fibroblasts5  | EDNRA      |
| 7.69E-286 | 3.234177   | 0.403 | 0.112 | 2.02E-281 | Fibroblasts5  | ASPN       |
| 4.63E-246 | 2.281203   | 0.494 | 0.189 | 1.21E-241 | Fibroblasts5  | F2R        |
| 1.10E-227 | 2.538705   | 0.31  | 0.078 | 2.89E-223 | Fibroblasts5  | CXCR4      |
| 1.89E-188 | 2.435958   | 0.289 | 0.08  | 4.95E-184 | Fibroblasts5  | GPM6B      |
| 3.35E-179 | 2.277535   | 0.363 | 0.128 | 8.79E-175 | Fibroblasts5  | TANC1      |
| 3.97E-109 | 2.274346   | 0.256 | 0.093 | 1.04E-104 | Fibroblasts5  | EDIL3      |
| 6.65E-84  | 2.391453   | 0.388 | 0.219 | 1.74E-79  | Fibroblasts5  | OGN        |

## Supplementary Table 3 (contd)

| p_val     | avg_log2FC | pct.1 | pct.2 | p_val_adj | cluster      | gene     |
|-----------|------------|-------|-------|-----------|--------------|----------|
| 0         | 3.204986   | 0.597 | 0.109 | 0         | Fibroblasts7 | CD248    |
| 0         | 2.799818   | 0.684 | 0.2   | 0         | Fibroblasts7 | PPIC     |
| 0         | 2.86725    | 0.7   | 0.224 | 0         | Fibroblasts7 | CLEC3B   |
| 0         | 2.833374   | 0.59  | 0.13  | 0         | Fibroblasts7 | GAS1     |
| 0         | 2.808414   | 0.865 | 0.483 | 0         | Fibroblasts7 | CRIP1    |
| 0         | 2.820367   | 0.511 | 0.142 | 0         | Fibroblasts7 | TPPP3    |
| 0         | 2.941982   | 0.425 | 0.098 | 0         | Fibroblasts7 | QPCT     |
| 0         | 3.036778   | 0.347 | 0.061 | 0         | Fibroblasts7 | KDELR3   |
| 0         | 3.193252   | 0.336 | 0.052 | 0         | Fibroblasts7 | HPGD     |
| 4.88E-289 | 2.887373   | 0.367 | 0.078 | 1.28E-284 | Fibroblasts7 | C1QTNF3  |
| 0         | 3.943295   | 0.773 | 0.098 | 0         | Fibroblasts8 | TM4SF1   |
| 0         | 3.400647   | 0.608 | 0.116 | 0         | Fibroblasts8 | SFRP4    |
| 0         | 4.069557   | 0.314 | 0.034 | 0         | Fibroblasts8 | CLDN1    |
| 0         | 6.245866   | 0.265 | 0.008 | 0         | Fibroblasts8 | EBF2     |
| 5.76E-250 | 2.914204   | 0.831 | 0.43  | 1.51E-245 | Fibroblasts8 | NR2F2    |
| 2.46E-213 | 3.217544   | 0.518 | 0.145 | 6.44E-209 | Fibroblasts8 | MTSS1    |
| 9.49E-208 | 3.289268   | 0.455 | 0.11  | 2.49E-203 | Fibroblasts8 | TAGLN    |
| 5.52E-116 | 3.064236   | 0.319 | 0.088 | 1.45E-111 | Fibroblasts8 | HRH1     |
| 1.56E-75  | 3.260804   | 0.299 | 0.105 | 4.09E-71  | Fibroblasts8 | SLC12A2  |
| 1.93E-60  | 3.228307   | 0.837 | 0.808 | 5.05E-56  | Fibroblasts8 | APOD     |
| 7.26E-227 | 3.276697   | 0.573 | 0.133 | 1.90E-222 | Fibroblasts9 | KIAA1217 |
| 2.75E-225 | 3.553748   | 0.525 | 0.108 | 7.21E-221 | Fibroblasts9 | IGFBP2   |
| 1.12E-207 | 2.860138   | 0.671 | 0.199 | 2.94E-203 | Fibroblasts9 | SFRP1    |
| 4.92E-167 | 2.447256   | 0.72  | 0.262 | 1.29E-162 | Fibroblasts9 | DIO2     |
| 3.81E-159 | 2.971986   | 0.345 | 0.061 | 9.98E-155 | Fibroblasts9 | FGFBP2   |
| 1.15E-130 | 4.195593   | 0.293 | 0.055 | 3.03E-126 | Fibroblasts9 | OLFML2A  |
| 1.01E-103 | 2.407836   | 0.58  | 0.252 | 2.64E-99  | Fibroblasts9 | UACA     |
| 6.79E-95  | 2.531405   | 0.338 | 0.089 | 1.78E-90  | Fibroblasts9 | LTBP2    |
| 8.92E-94  | 2.76328    | 0.375 | 0.109 | 2.34E-89  | Fibroblasts9 | CHN1     |
| 7.16E-56  | 2.523632   | 0.25  | 0.076 | 1.88E-51  | Fibroblasts9 | MSI2     |
